# Supplementary material for: Effects of Different Ambient Temperatures on Caecal Microbial Composition in Broilers
Source: PubMed Central journal article supplement — Pol J Microbiol. 2021 Mar 19;70(1):33–43. doi: 10.33073/pjm-2021-001 (PMC8008768; doi:10.33073/pjm-2021-001), 2021-03-19
Supplement: pjm-70-1-033_Supplementary.pdf [file pjm-70-1-033_Supplementary.pdf]

Supplementary materials for the article:

Yang Y. et al. Effects of Different Ambient Temperatures on Caecal Microbial Composition in Broilers

Pol J Microbiol. 2021, Vol. 70, No 1, 33-43

Table SI  
Temperature management.

| Day | HC group | MC group | LC group |
|-----|----------|----------|----------|
| 1   | 36.5     | 33.5     | 30.5     |
| 2   | 36       | 33       | 30       |
| 3   | 35.5     | 32.5     | 29.5     |
| 4   | 35       | 32       | 29       |
| 5   | 34.5     | 31.5     | 28.5     |
| 6   | 34       | 31       | 28       |
| 7   | 33.5     | 30.5     | 27.5     |
| 8   | 33       | 30       | 27       |
| 9   | 32.5     | 29.5     | 26.5     |
| 10  | 32       | 29       | 26       |
| 11  | 32       | 29       | 26       |
| 12  | 31.5     | 28.5     | 25.5     |
| 13  | 31       | 28       | 25       |
| 14  | 31       | 28       | 25       |
| 15  | 30.5     | 27.5     | 24.5     |
| 16  | 30.5     | 27.5     | 24.5     |
| 17  | 30       | 27       | 24       |
| 18  | 30       | 27       | 24       |
| 19  | 29.5     | 26.5     | 24.5     |
| 20  | 29       | 26       | 23       |
| 21  | 29       | 26       | 23       |
| 22  | 28.5     | 25.5     | 22.5     |
| 23  | 28       | 25       | 22       |
| 24  | 28       | 25       | 22       |
| 25  | 27.5     | 24.5     | 21.5     |
| 26  | 27.5     | 24.5     | 21.5     |
| 27  | 27       | 24       | 21       |
| 28  | 27       | 24       | 21       |
| 29  | 26.5     | 23.5     | 20.5     |

|    |      |      |      |
|----|------|------|------|
| 30 | 26   | 23   | 20   |
| 31 | 26   | 23   | 20   |
| 32 | 25.5 | 22.5 | 19.5 |
| 33 | 25   | 22   | 19   |
| 34 | 25   | 22   | 19   |
| 35 | 24.5 | 21.5 | 18.5 |
| 36 | 24   | 21   | 18   |
| 37 | 24   | 21   | 18   |
| 38 | 23.5 | 20.5 | 17.5 |
| 39 | 23   | 20   | 17   |
| 40 | 23   | 20   | 17   |
| 41 | 22.5 | 19.5 | 16.5 |
| 42 | 22   | 19   | 16   |

When the temperature is 0.5 degree lower than the expected temperature, the heater is turned on and the fan is closed. When the heater is 0.5 degree higher, the heater is closed and the ventilator opens.

Table SII

Ingredient and nutrient composition (% , as feed) of the experimental diets.

| Ingredient (%)                | Starter diet (%) 1 to 21d | Finisher diet (%) 22 to 42d |
|-------------------------------|---------------------------|-----------------------------|
| Corn, first                   | 60.00                     | 66.40                       |
| Soybean meal 43               | 27.40                     | 20.00                       |
| Corn protein flour            | 6.00                      | 8.00                        |
| Imported fish meal            | 1.00                      | 0.00                        |
| Soybean oil                   | 1.90                      | 1.60                        |
| Stone powder                  | 1.10                      | 1.20                        |
| Calcium hydrogen phosphate    | 1.10                      | 1.14                        |
| Salt                          | 0.35                      | 0.35                        |
| Methionine                    | 0.07                      | 0.06                        |
| Lysine                        | 0.08                      | 0.25                        |
| 1% broiler premix             | 1.00                      | 1.00                        |
| Calculated nutrients level, % |                           |                             |
| ME, Mcal/kg                   | 2,950                     | 3,000                       |
| Crude protein                 | 21.00                     | 19.00                       |
| Calcium                       | 0.81                      | 0.80                        |
| Phosphorus                    | 0.50                      | 0.50                        |
| Lysine                        | 1.10                      | 1.00                        |
| Methionine                    | 0.50                      | 0.38                        |
| Methionine + Cystine          | 0.90                      | 0.72                        |
| Threonine                     | 0.80                      | 0.74                        |
| Tryptophan                    | 0.20                      | 0.18                        |

ME – Metabolizable energy, CP – Crude protein, Lys – lysine, Met – Methionine, Cys – Cystine, Ca – Calcium, P – Phosphorus, Thr – Threonine, Try– Tryptophan.

Table SIII

Description of the assembly results of the cecal microbiota from avian broiler.

| Sample name | Clean reads | Mapped reads | Mapping rate (%) | Bases (bp) | Q20 (%) | GC (%) | Average length (bp) | OTUs |
|-------------|-------------|--------------|------------------|------------|---------|--------|---------------------|------|
| HC-1        | 62,200      | 55,995       | 90.0241          | 25,992,533 | 95.13   | 51.79  | 417                 | 309  |
| HC-2        | 57,308      | 52,296       | 91.2542          | 23,829,524 | 95.24   | 50.43  | 415                 | 315  |
| HC-3        | 63,237      | 57,521       | 90.9609          | 26,149,494 | 95.81   | 51.85  | 413                 | 319  |
| HC-4        | 56,772      | 50,275       | 88.5559          | 23,575,478 | 95.57   | 51.30  | 415                 | 344  |
| HC-5        | 55,694      | 49,371       | 88.6468          | 23,040,570 | 95.64   | 52.14  | 413                 | 314  |
| HC-6        | 58,876      | 52,177       | 88.6218          | 24,561,638 | 95.10   | 51.63  | 417                 | 313  |
| HC-7        | 57,653      | 47,699       | 82.7346          | 23,941,978 | 95.40   | 50.85  | 415                 | 316  |
| HC-8        | 59,085      | 55,256       | 93.5195          | 24,365,271 | 95.45   | 51.46  | 412                 | 351  |
| HC-9        | 62,410      | 52,361       | 83.8984          | 25,882,088 | 95.68   | 50.43  | 414                 | 312  |
| HC-10       | 57,743      | 52,127       | 90.2741          | 23,992,159 | 95.24   | 51.15  | 415                 | 307  |
| HC-11       | 58,005      | 51,912       | 89.4957          | 24,026,730 | 95.45   | 51.45  | 414                 | 261  |
| HC-12       | 55,206      | 47,236       | 85.5631          | 22,796,376 | 95.84   | 51.80  | 412                 | 305  |
| MC-1        | 56,586      | 51,411       | 90.8546          | 23,616,313 | 95.39   | 51.38  | 417                 | 322  |
| MC-2        | 64,452      | 59,519       | 92.3462          | 26,783,315 | 95.31   | 51.67  | 415                 | 353  |
| MC-3        | 58,027      | 54,411       | 93.7684          | 24,133,155 | 95.47   | 52.86  | 415                 | 359  |
| MC-4        | 61,721      | 57,159       | 92.6086          | 25,759,115 | 95.64   | 52.28  | 417                 | 309  |
| MC-5        | 55,802      | 50,451       | 90.4107          | 23,249,831 | 95.35   | 51.62  | 416                 | 354  |
| MC-6        | 62,926      | 55,837       | 88.7343          | 25,964,894 | 94.78   | 52.42  | 412                 | 367  |
| MC-7        | 52,667      | 49,404       | 93.8044          | 21,784,335 | 95.63   | 51.40  | 413                 | 298  |
| MC-8        | 63,691      | 56,754       | 89.1083          | 26,528,067 | 95.37   | 51.76  | 416                 | 336  |
| MC-9        | 59,648      | 54,777       | 91.8337          | 24,953,755 | 95.01   | 49.92  | 418                 | 213  |
| MC-10       | 61,361      | 56,356       | 91.8433          | 25,242,337 | 95.79   | 51.81  | 411                 | 375  |
| MC-11       | 62,006      | 55,831       | 90.0412          | 25,836,552 | 95.29   | 51.80  | 416                 | 298  |
| MC-12       | 58,734      | 53,637       | 91.3218          | 24,532,870 | 95.11   | 51.66  | 417                 | 338  |
| LC-1        | 64,086      | 58,968       | 92.0138          | 26,390,102 | 95.22   | 51.22  | 411                 | 299  |
| LC-2        | 64,133      | 61,846       | 96.4339          | 26,634,571 | 95.17   | 52.27  | 415                 | 388  |
| LC-3        | 62,116      | 56,338       | 90.6980          | 25,744,574 | 95.09   | 51.90  | 414                 | 319  |
| LC-4        | 59,952      | 56,309       | 93.9234          | 24,582,942 | 95.13   | 51.59  | 410                 | 333  |
| LC-5        | 56,034      | 50,925       | 90.8823          | 22,989,563 | 95.50   | 52.70  | 410                 | 306  |
| LC-6        | 64,809      | 59,218       | 91.3731          | 26,803,083 | 94.99   | 52.17  | 413                 | 323  |
| LC-7        | 60,823      | 54,563       | 89.7078          | 25,106,567 | 95.17   | 51.46  | 412                 | 256  |
| LC-8        | 64,557      | 59,162       | 91.6430          | 26,978,537 | 94.67   | 50.98  | 417                 | 276  |
| LC-9        | 62,848      | 57,992       | 92.2734          | 26,078,317 | 94.84   | 50.16  | 414                 | 257  |
| LC-10       | 60,243      | 57,908       | 96.1240          | 25,333,945 | 94.49   | 48.32  | 420                 | 176  |
| LC-11       | 64,187      | 57,596       | 89.7315          | 26,474,297 | 95.15   | 51.14  | 412                 | 327  |
| LC-12       | 58,668      | 53,438       | 91.0854          | 24,239,288 | 95.10   | 52.29  | 413                 | 310  |

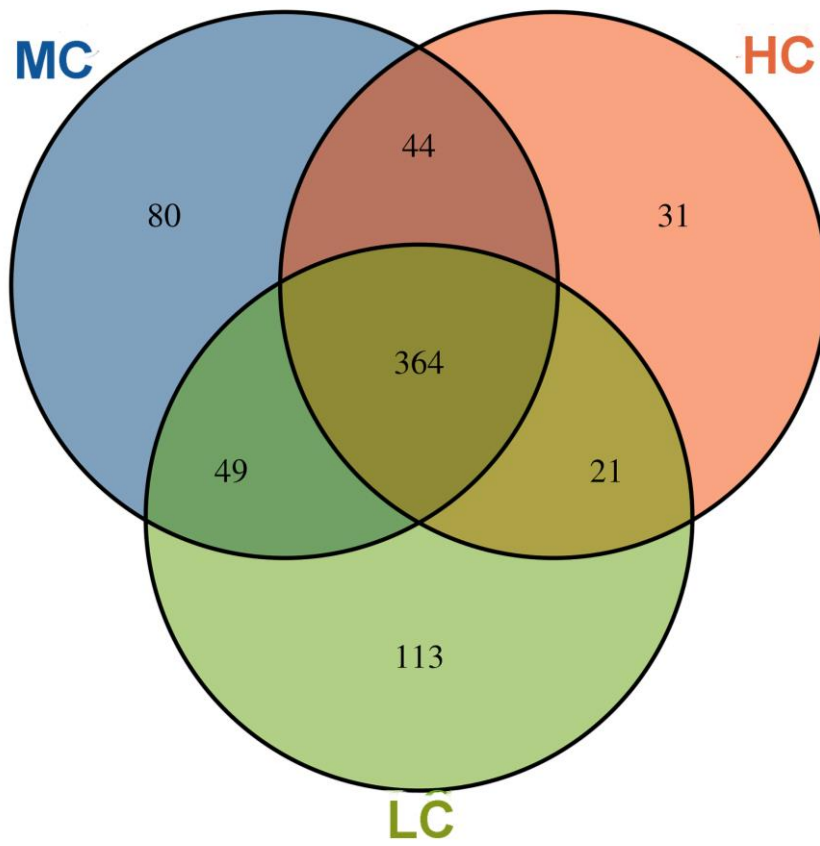

Fig. S1. Venn diagram of microbiota across different groups.

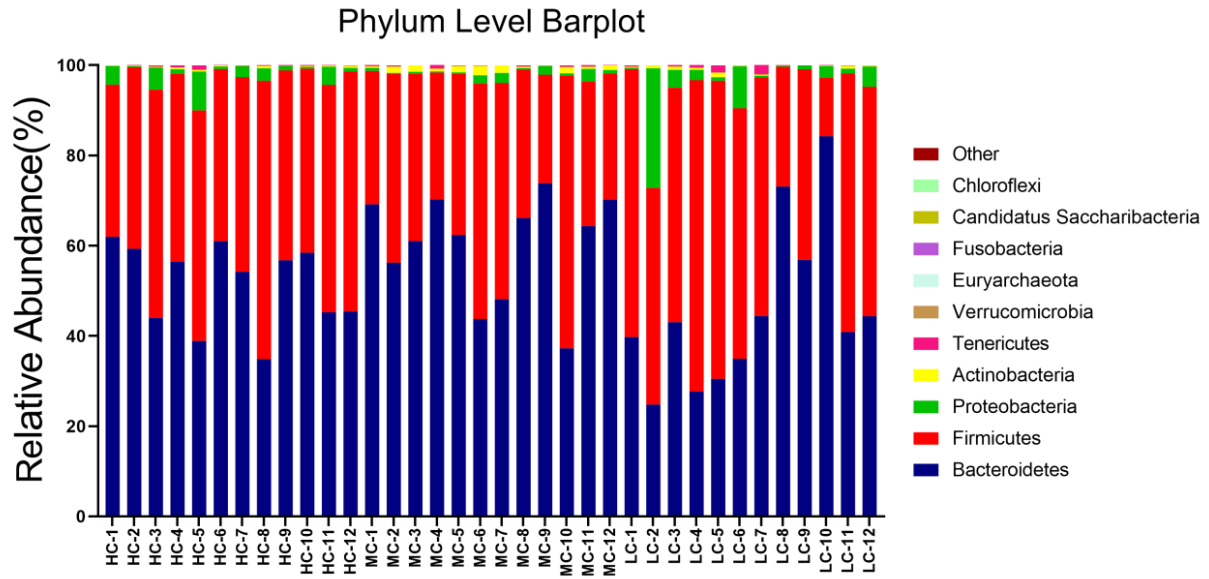

Fig. S2. Taxonomy profile of microbiota composition at the phylum level.

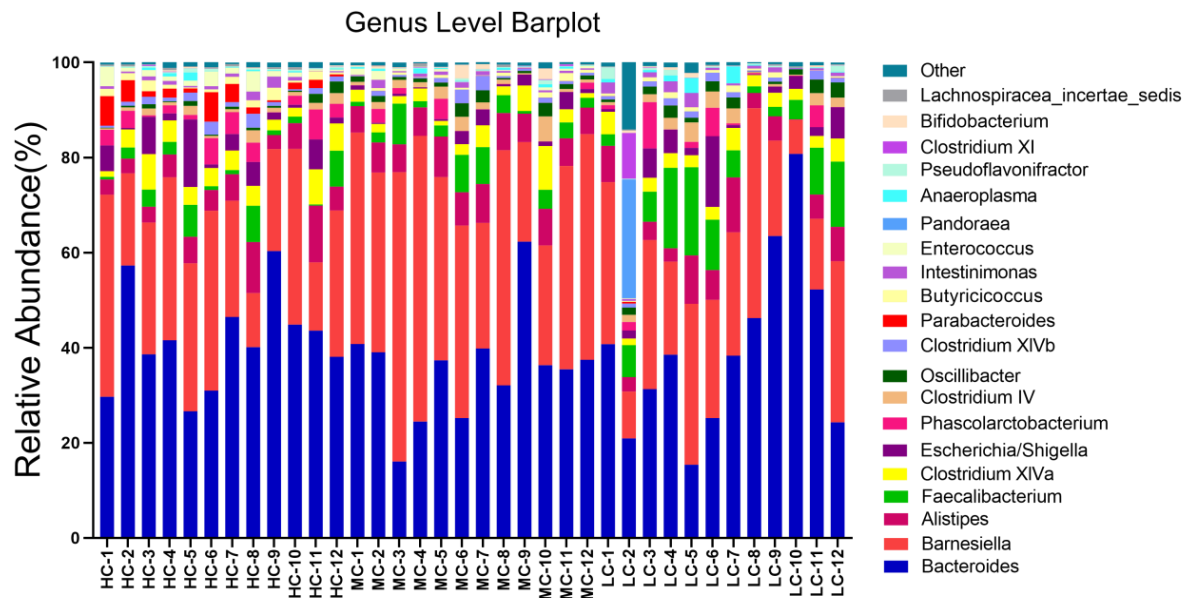

Fig. S3. Taxonomy profile of microbiota composition at the genus level.
